# Supplementary material
Source: PubMed Central journal article supplement (PMC5226927)
Supplement: NIHMS801283-supplement-1.pdf [file NIHMS801283-supplement-1.pdf]

# CORRECTIVE ACTION PLAN (CAP) CODE SHEET

---

**Study Information:** Protocol Number:

Protocol Title:

P.I.:

Lead Organization:

Trial Activation Date:

**Accrual Information:**

Planned accrual rate:          patients per month;          minimum,          maximum

Enrollment to date:          patients as of

Pattern of accrual:

|  |  |  |  |  |  |
|--|--|--|--|--|--|
|  |  |  |  |  |  |
|  |  |  |  |  |  |

|  |  |  |  |
|--|--|--|--|
|  |  |  |  |
|  |  |  |  |

*To be completed by investigators:*

**Accrual Status**

- If applicable, please provide the accrual status of each arm/cohort.
  
- If an interim analysis is planned, how many additional patients will be needed to reach that point and when might the interim analysis occur? (use the box below)
- If an interim analysis was recently completed, please discuss the results. (use the box below)

**Assessment of Accrual Challenges**

Based on a recent analysis of corrective action plans, CTEP has developed the following categories on the next two pages to track slow accrual reasons and corrective actions to be taken. **Please complete the following two pages for your trial.**

## **EARLY PHASE SLOW ACCRUAL REASONS**

**Instructions:** Please use the following categories to indicate (via the checkboxes) the top reason(s) contributing to slow accrual to your trial. **Check no more than 5 boxes** on this page.

### **Eligibility**

Strict eligibility criteria  
Rare disease  
High rate of screen failures

### **Safety/Toxicity**

DLTs leading to dose reduction  
FDA holds or amendments  
Required CAEPR/ RRA/Action Letter  
Pre-specified halt to enrollment (e.g., interim analyses, stopping rules, DMC, or RP2D)  
Enrollment slowed (but not stopped) due to safety observation periods/safety run-in

### **Institutional/PI/administrative**

Staffing/management/operational issues  
Competing trials at institution(s)  
Institutional scientific review  
Site-initiated amendment(s)  
Low rate of patient referrals to trial

### **Site Activation Delays**

Delays with CIRB approval  
Delays with local IRB approval  
Delays with site activation at planned sites  
Planned site(s) not activated or were removed  
Trial open at too few or a limited number of institutions (limiting population access)

### **Study design/protocol**

Trial complexity  
Treatment schedule or procedures causing undue patient burden or trial delay

### **Environment/external issues**

Newly approved drugs for diseases  
Changes in standard of care

### **Drug supply**

Lack of available drug supply  
Drug discontinued  
Company withdrew/ not willing to supply drug

### **Budget/insurance issues**

Loss of study funding  
Study procedures or drug not covered  
Low reimbursement rate

### **CTEP administrative issues**

CTEP request to halt enrollment  
CTEP amendment request (not safety related)

### **Other (not listed above): (specify):**

## **EARLY PHASE CORRECTIVE ACTIONS TO ADDRESS SLOW ACCRUAL**

**Instructions:** Please use the following categories to indicate (via the checkboxes) the proposed corrective actions that you will be taking to address slow accrual to your trial. Multiple responses are acceptable, but only mark those actions you expect to **implement in the next 6 months.**

### **Addressing eligibility concerns**

Broaden eligibility criteria

Broaden patient screening activities (by study team) to identify eligible patients

### **Addressing institutional/PI/administrative concerns**

Increase study team review processes, meetings, conference calls around trial

Increase/change staffing

Change administrative processes (e.g., streamlining, increase efficiencies)

Close competing trial(s)

### **Addressing site activation delays**

Activate/ receive IRB approval at planned participating institutions

Open at new institution(s) beyond those proposed in the protocol. If so, how many sites?      Number of sites

Open network/group-wide

Place on CTSU

### **Addressing study design/protocol concerns**

Amend the treatment design (i.e. decrease toxicity, statistical design, or revise schema). Please describe the proposed amendment in the box below.

### **Addressing budget/insurance concerns**

Increase per case funding

Obtain additional funding

### **Promotion of trial**

External (i.e., reach out to doctors or other cancer centers in your community to increase referrals)

Internal (i.e., promote trial within your own center/organization)

Group wide (i.e., promote across ETCTN)

Increase awareness through advocacy groups and professional societies

### **Other (not listed above)**

Specify:

**ADDITIONAL COMMENTS TO ADDRESS EARLY PHASE SLOW ACCRUAL**

**Instructions:** Please use the space below to provide CTEP any additional comments you may want to add in relation to slow accrual.
